## Clinical importance of left atrial infiltration in cardiac transthyretin amyloidosis

Bandera F.<sup>1</sup>; Martone R.<sup>2</sup>; Chacko L.<sup>2</sup>; Ganesanathan S.<sup>2</sup>; Gilbertson JA.<sup>2</sup>; Ponticos M.<sup>2</sup>; Petrie A.<sup>2</sup>; Cappelli F.<sup>3</sup>; Guazzi M.<sup>1</sup>; Potena L.<sup>4</sup>; Rapezzi C.<sup>5</sup>; Leone O.<sup>4</sup>; Hawkins P.<sup>2</sup>; Gillmore JD.<sup>2</sup>; Fontana M.<sup>2</sup>

<sup>1</sup>IRCCS Polyclinic San Donato, Department of University Cardiology, Milan, Italy

<sup>2</sup>Royal Free Hospital, National Amyloidosis Centre, University College London, London, United Kingdom of Great Britain & Northern Ireland

<sup>3</sup>Careggi University Hospital (AOUC), Tuscan Regional Amyloid Center, Florence, Italy

<sup>4</sup>Azienda Ospedaliero, Universitaria di Bologna, Policlinico S.Orsola-Malpighi, Bologna, Italy

<sup>5</sup>University Hospital of Ferrara, Ferrara, Italy

**Funding Acknowledgements:** Type of funding sources: None.

**INTRODUCTION:** The clinical significance of left atrial (LA) involvement in ATTR amyloidosis cardiomyopathy (ATTR-CM) has not been characterized. The aims of this study were to characterize: (1) LA pathology in explanted ATTR-CM hearts; (2) LA mechanics using echocardiographic speckle-tracking in a large cohort of ATTR-CM patients; (3) to study the association with mortality.

**METHODS AND RESULTS:** Congo red staining and immunohistochemistry was performed to assess the presence, type and extent of amyloid and associated changes in 5 explanted ATTR-CM atria. Echo speckle-tracking was used to assess LA reservoir, conduit, contractile function and stiffness in 906 ATTR-CM patients (551 wt-ATTR-CM; 93 T60A-ATTR-CM; 241 V122I-ATTR-CM; 21 other).

There was extensive ATTR amyloid infiltration in the 5 atria with loss of normal architecture, vessels remodelling, capillary disruption and subendocardial fibrosis. Echo speckle-tracking in 906 ATTR-CM patients demonstrated increased atrial stiffness [median(25th-75th quartile) 1.83(1.15-2.92)] that remained independently associated with prognosis, after adjusting for known predictors (lnLA stiff:HR = 1.26, CI 1.07-1.57; p = 0.009). There was substantial impairment of the three phasic functional atrial components [reservoir 8.86(5.94-12.97)%; conduit 6.5(4.53-9.28)%; contraction function 4.0(2.29-6.56)%]. Atrial contraction was absent in 21.6% of patients whose ECG showed sinus rhythm (SR)-"atrial electro-mechanical dissociation"(AEMD). AEMD was associated with poorer prognosis compared to SR patients with effective mechanical contraction (p < 0.0001). AEMD conferred a similar prognosis to patients in AF.

**CONCLUSION:** The phenotype of ATTR-CM includes significant infiltration of the atrial walls with progressive loss of atrial function and increased stiffness, which is a strong independent predictor of mortality. AEMD emerged as a distinctive phenotype identifying patients in SR with poor prognosis.

Abstract Figure.

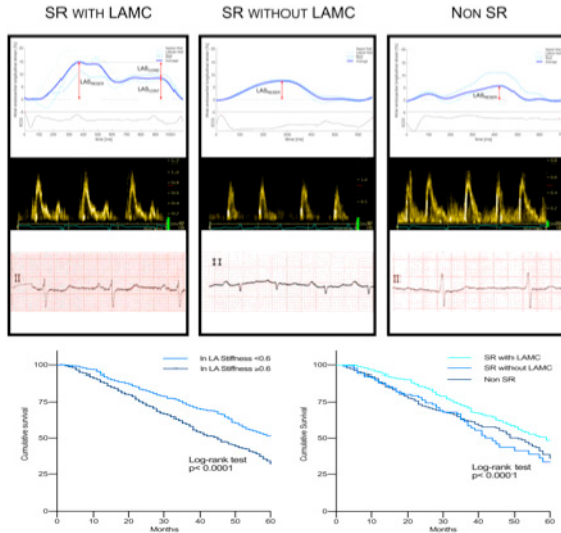

Source: http://academic.oup.com/ehjcimaging/article-pdf/22/Supplement_1/jeaa356.176/36214343/jeaa356.176.pdf
